# Supplementary material for: Descending Dysploidy and Bidirectional Changes in Genome Size Accompanied Crepis (Asteraceae) Evolution
Source: MDPI journal article supplement (doi:10.3390/genes12091436), 2021-09-17
Supplement: s1 [file s1]

**Table S3.** Genome size of *Crepis* species analysed in present study and data retrieved from literature

| Species                                          | Genome size<br>(pg/1C $\pm$ SD<br>present study | Genome size<br>(pg/1C $\pm$ SD)<br>data taken from literature |
|--------------------------------------------------|-------------------------------------------------|---------------------------------------------------------------|
| <i>Crepis aculeata</i>                           | 2.89 $\pm$ 0.04                                 | -                                                             |
| <i>C. acuminata</i> (2x)                         |                                                 | 13.8 $\pm$ 0.4 [1]                                            |
| <i>C. albida</i>                                 | 3.08 $\pm$ 0.03                                 | -                                                             |
| <i>C. alpestris</i>                              | 2.99 $\pm$ 0.03                                 | -                                                             |
| <i>C. alpina</i>                                 | 2.20 $\pm$ 0.05                                 | 3.00 [2]                                                      |
| <i>C. aspera</i>                                 | 2.15 $\pm$ 0.02                                 | -                                                             |
| <i>C. atribarba</i> (2x)                         |                                                 | 13.3 $\pm$ 0.7 [1]                                            |
| <i>C. aurea</i>                                  | 1.63 $\pm$ 0.10                                 | 1.75 $\pm$ 0.07 [3]                                           |
| <i>C. biennis</i>                                | 10.45 $\pm$ 0.33                                | 9.51 $\pm$ 0.492 [3]                                          |
| <i>C. bungei</i>                                 |                                                 | 4.05 $\pm$ 0.053 [3]                                          |
| <i>C. capillaris</i>                             | 2.07 $\pm$ 0.08                                 | -                                                             |
| <i>C. chrysantha</i> subsp.<br><i>chrysantha</i> |                                                 | 4.64 $\pm$ 0.053 [3]                                          |
| <i>C. conyzifolia</i>                            | 6.08 $\pm$ 0.16                                 | -                                                             |
| <i>C. crocea</i> (4x)                            |                                                 | 9.61 $\pm$ 0.053 [3]                                          |
| <i>C. dioscoridis</i>                            | 4.58 $\pm$ 0.13                                 | -                                                             |
| <i>C. foetida</i>                                | 2.03 $\pm$ 0.08                                 | 1.46 $\pm$ 0.034 [3]                                          |
| <i>C. foetida</i> subsp.<br><i>rhoaedifolia</i>  | 2.17 $\pm$ 0.02                                 | -                                                             |
| <i>C. jacquinni</i>                              | 5.12 $\pm$ 0.05                                 | -                                                             |
| <i>C. kotschyana</i>                             | 2.92 $\pm$ 0.08                                 | -                                                             |
| <i>C. lacera</i>                                 | 7.46 $\pm$ 0.10                                 | -                                                             |
| <i>C. lapsanoides</i>                            |                                                 | 5.6 [4]                                                       |
| <i>C. leontodontoides</i>                        | 1.06 $\pm$ 0.03                                 | 1.14 $\pm$ 0.012 [3]                                          |
| <i>C. mollis</i>                                 | 2.53 $\pm$ 0.04                                 | -                                                             |
| <i>C. modocensis</i> (2x)                        |                                                 | 12.2 $\pm$ 0.3 [1]                                            |
| <i>C. multicaulis</i> subsp.<br><i>congesta</i>  |                                                 | 1.78 $\pm$ 0.018 [3]                                          |
| <i>C. nicaeensis</i>                             | 3.17 $\pm$ 0.02                                 | -                                                             |
| <i>C. occidentalis</i> (4x)                      |                                                 | 23.8 $\pm$ 1.7 [1]                                            |
| <i>C. palaestina</i>                             | 7.05 $\pm$ 0.19                                 | 6.10 [4]                                                      |
| <i>C. paludosa</i>                               | 4.53 $\pm$ 0.19                                 | 4.53 $\pm$ 0.074 [3]                                          |
| <i>C. pannonica</i>                              | 7.27 $\pm$ 0.06                                 | -                                                             |
| <i>C. polymorpha</i>                             | 3.13 $\pm$ 0.02                                 | -                                                             |
| <i>C. pontana</i>                                |                                                 | 6.9 [4]                                                       |
| <i>C. pulchra</i>                                | 5.59 $\pm$ 0.12                                 | 5.50 [5]                                                      |
| <i>C. pusilla</i>                                |                                                 | 1.11 $\pm$ 0.025 [3]                                          |
| <i>C. praemorsa</i>                              |                                                 | 5.3 [4]                                                       |
| <i>C. pyrenaica</i>                              | 3.54 $\pm$ 0.05                                 | 3.58 $\pm$ 0.051 [3]                                          |
| <i>C. rubra</i>                                  | 2.86 $\pm$ 0.07                                 | 2.90 [4]                                                      |

|                                                   |             |          |
|---------------------------------------------------|-------------|----------|
| <i>C. sancta</i>                                  | 1.60 ± 0.02 | -        |
| <i>C. setosa</i>                                  | 1.67 ± 0.02 | 1.70 [5] |
| <i>C. sibirica</i>                                | 6.98 ± 0.04 | -        |
| <i>C. succisifolia</i>                            | 2.34 ± 0.05 | -        |
| <i>C. syriaca</i>                                 | 2.39 ± 0.28 | -        |
| <i>C. taraxacifolia</i>                           | 2.47 ± 0.58 | -        |
| <i>C. tectorum</i>                                | 3.06 ± 0.05 | -        |
| <i>C. vesicaria</i> (1) 4x                        | 2.78 ± 0.09 | -        |
| <i>C. vesicaria</i> (3) 2x                        | 2.43 ± 0.03 | -        |
| <i>C. viscidula</i> subsp.<br><i>gieracioides</i> |             | 4.90 [5] |
| <i>C. zacintha</i>                                | 1.03 ± 0.02 | -        |
| <i>Lapsana communis</i>                           | 1.22 ± 0.04 | -        |

## References

- [1] Sears, C.J., Whitton, J., 2016. A reexamination of the North American *Crepis* agamic complex and comparison with the findings of Babcock and Stebbins' classic biosystematic monograph. *American Journal of Botany* 103, 1289-1299.
- [2] Wallace, H., Sparkes, C.A., Maden, M., 1972. Nuclear DNA content of three *Crepis* species. *Heredity* 29, 367-373
- [3] Enke, N, Fuchs, J, Gemeinholzer, B. 2011. Shrinking genomes? Evidence from genome size variation in *Crepis* (Compositae). *Plant Biology* 13: 185-193.
- [4] Bennett, MD, Smith, JB. 1976. Nuclear-DNA Amounts in Angiosperms. *Philosophical Transactions of the Royal Society B-Biological Sciences* 274: 227-274.
- [5] Dimitrova, D, Greilhuber, J. 2000. Karyotype and DNA-content evolution in ten species of *Crepis* (Asteraceae) distributed in Bulgaria. *Botanical Journal of the Linnean Society* 132: 281-297.
