# Supplementary material for: Descending Dysploidy and Bidirectional Changes in Genome Size Accompanied Crepis (Asteraceae) Evolution
Source: MDPI journal article supplement (doi:10.3390/genes12091436), 2021-09-17
Supplement: s1 [file s1]

**Table S5.** Length of analyzed plastid DNA and nrITS (nuclear ITS: ITS1-5.8S rDNA-ITS2) data sets.

| Data set          | sequence length            |                                          |                      |
|-------------------|----------------------------|------------------------------------------|----------------------|
| <i>rpl32-trnL</i> | <i>rpl32</i> gene<br>18 bp | <i>rpl32-trnL</i> spacer<br>436 - 874 bp | -                    |
| <i>rps16-trnK</i> | -                          | <i>rps16-trnK</i> spacer<br>664 – 729 bp | -                    |
| <i>psbD-trnT</i>  | -                          | <i>trnT-psbD</i> spacer<br>760 – 1076 bp | -                    |
| <i>ndhC-trnV</i>  | -                          | <i>ndhC-trnV</i> spacer<br>734 – 988 bp  | -                    |
| nrITS             | ITS1<br>167 - 180 bp       | 5,8S rDNA<br>158 bp                      | ITS2<br>201 – 262 bp |
