# Supplementary material for: Descending Dysploidy and Bidirectional Changes in Genome Size Accompanied Crepis (Asteraceae) Evolution
Source: MDPI journal article supplement (doi:10.3390/genes12091436), 2021-09-17
Supplement: s1 [file s1]

**Table S1.** Sequences of primers used for PCR amplification and sequencing. (White et al., 1990 ; Shaw et al., 2007)

| Region                | Primer name and sequence (5'-3')                                                                              |
|-----------------------|---------------------------------------------------------------------------------------------------------------|
| ITS1-5.8S rDNA-ITS2   | <b>ITS4:</b> TCC TCC GCT TAT TGA TAT GC<br><b>ITS5:</b> GGA AGT AAA AGT CGT AAC AAG G                         |
| <i>3'trnV-ndhC</i>    | <b>trnV(UAC)x2:</b> GTC TAC GGT TCG ART CCG TA<br><b>ndhC:</b> TAT TAT TAG AAA TGY CCA RAA AAT ATC ATA<br>TTC |
| <i>psbD-trnT</i>      | <b>psbD:</b> CTC CGT ARC CAG TCA TCC ATA<br><b>trnT(GGU)-R:</b> CCC TTT TAA CTC AGT GGT AG                    |
| <i>3'rps16-5'trnK</i> | <b>rps16x2F2:</b> AAA GTG GGT TTT TAT GAT CC<br><b>trnK<sup>(UUU)</sup>x1:</b> TTA AAA GCC GAG TAC TCT ACC    |
| <i>rpl32-trnL</i>     | <b>trnL<sup>(UAG)</sup>:</b> CTG CTT CCT AAG AGC AGC GT<br><b>rpl32-F:</b> CAG TTC CAA AA A AAC GTA CTT C     |
