# Supplementary material for: Descending Dysploidy and Bidirectional Changes in Genome Size Accompanied Crepis (Asteraceae) Evolution
Source: MDPI journal article supplement (doi:10.3390/genes12091436), 2021-09-17
Supplement: s1 [file s1]

**Table S4.** The  $\Delta$ AIC scores and Akaike weights of each model tested in ChromEvol 2.0 software for nrITS and cpDNA data sets.

| Model* | Dataset      |               |              |               |
|--------|--------------|---------------|--------------|---------------|
|        | ITS          |               | cpDNA        |               |
|        | $\Delta$ AIC | Akaike weight | $\Delta$ AIC | Akaike weight |
| CR     | <b>0</b>     | <b>0.45</b>   | 0.7          | 0.34          |
| CRD    | 0.2          | 0.40          | <b>0</b>     | <b>0.48</b>   |
| CRDE   | 2            | 0.16          | 2            | 0.18          |
| CRND   | 18.4         | 0.00          | 25.6         | 0.00          |
| LR     | 108.3        | 0.00          | 101.4        | 0.00          |
| LRD    | 108.3        | 0.00          | 101.7        | 0.00          |
| LRDE   | 131.4        | 0.00          | 126.3        | 0.00          |
| LRND   | 228          | 0.00          | 101.1        | 0.00          |

\*CR – const\_rate, CRD – const\_rate\_demi, CRDE – const\_rate\_demi\_est, CRND – const\_rate\_no\_dupl, LR – linear\_rate, LRD – linear\_rate\_demi, LRDE – linear\_rate\_demi\_est, LRND – linear\_rate\_no\_dupl,
