# Supplementary material for: Descending Dysploidy and Bidirectional Changes in Genome Size Accompanied Crepis (Asteraceae) Evolution
Source: MDPI journal article supplement (doi:10.3390/genes12091436), 2021-09-17
Supplement: s1 [file s1]

**Table S2.** Species name and GenBank accessions numbers of the selected *Crepis* sequences from Enke et al. 2008 used in this study

| Species name                                  | GenBank accession number |
|-----------------------------------------------|--------------------------|
| <i>C. albida</i> subsp. <i>albida</i>         | EU363606                 |
| <i>C. albida</i> subsp. <i>grosii</i>         | EU363594                 |
| <i>C. albida</i> subsp. <i>scorzoneroides</i> | EU363595                 |
| <i>C. alpestris</i>                           | AJ633373                 |
| <i>C. alpina</i>                              | EU363649                 |
| <i>C. aspera</i>                              | EU363628                 |
| <i>C. aurea</i> subsp. <i>aurea</i>           | EU363627                 |
| <i>C. auriculifolia</i>                       | EU363626                 |
| <i>C. baldaccii</i>                           | EU363625                 |
| <i>C. bellidifolia</i>                        | EU363615                 |
| <i>C. biennis</i>                             | AJ633355                 |
| <i>C. bungei</i>                              | AJ633374                 |
| <i>C. bursifolia</i>                          | EU363623                 |
| <i>C. capillaris</i>                          | AJ633381                 |
| <i>C. chondrilloides</i>                      | EU363593                 |
| <i>C. chrysantha</i> subsp. <i>chrysantha</i> | EU363622                 |
| <i>C. cretica</i>                             | EU363614                 |
| <i>C. crocea</i>                              | EU363590                 |
| <i>C. cytherea</i>                            | EU363646                 |
| <i>C. darvazica</i>                           | EU363600                 |
| <i>C. dioritica</i>                           | EU363620                 |
| <i>C. flexuosa</i>                            | EU363596                 |
| <i>C. foetida</i>                             | EU363619                 |
| <i>C. foetida</i> subsp. <i>rhoeadifolia</i>  | EU363613                 |
| <i>C. frigida</i>                             | EU363612                 |
| <i>C. guioliana</i>                           | EU363618                 |
| <i>C. heldreichiana</i>                       | EU363603                 |
| <i>C. hierosolymitana</i>                     | EU363602                 |
| <i>C. hookeriana</i>                          | EU363605                 |
| <i>C. hypochaeridea</i>                       | EU363617                 |
| <i>C. jacquinii</i> subsp. <i>kernerii</i>    | EU363636                 |
| <i>C. jacquinii</i>                           | AJ633378                 |
| <i>C. kotschyana</i>                          | EU363635                 |
| <i>C. lampsanoides</i>                        | EU363599                 |
| <i>C. leontodontoides</i>                     | EU363592                 |
| <i>C. macropus</i>                            | EU363589                 |
| <i>C. merxmuelieri</i>                        | EU363644                 |
| <i>C. mollis</i>                              | AJ633380                 |
| <i>C. multicaulis</i> subsp. <i>congesta</i>  | EU363642                 |
| <i>C. nana</i>                                | EU363591                 |
| <i>C. neglecta</i> subsp. <i>corymbosa</i>    | EU363611                 |
| <i>C. neglecta</i> subsp. <i>neglecta</i>     | EU363610                 |
| <i>C. nigrescens</i>                          | EU363609                 |

|                                         |          |
|-----------------------------------------|----------|
| <i>C. oporinoides</i>                   | EU363633 |
| <i>C. oreades</i>                       | EU363640 |
| <i>C. palaestina</i>                    | EU363639 |
| <i>C. paludosa</i>                      | EU366428 |
| <i>C. pontana</i>                       | AJ633275 |
| <i>C. praemorsa</i>                     | EU363654 |
| <i>C. pulchra</i>                       | AJ633369 |
| <i>C. purpurea</i>                      | EU363653 |
| <i>C. pusilla</i>                       | EU363650 |
| <i>C. pyrenaica</i>                     | EU363624 |
| <i>C. rhaetica</i>                      | AJ633379 |
| <i>C. rubra</i>                         | AJ633350 |
| <i>C. sahendi</i>                       | EU363651 |
| <i>C. sancta subsp. nemauensis</i>      | EU363632 |
| <i>C. setosa</i>                        | EU363585 |
| <i>C. sibthorpiana</i>                  | EU363648 |
| <i>C. smyrnaea</i>                      | EU363598 |
| <i>C. sonchifolia</i>                   | EU363637 |
| <i>C. thomsonii</i>                     | EU363647 |
| <i>C. tingitana</i>                     | EU363586 |
| <i>C. triasii</i>                       | EU363597 |
| <i>C. turcomanica</i>                   | EU363652 |
| <i>C. tybakiensis</i>                   | EU363631 |
| <i>C. vesicaria subsp. haenseleri</i>   | AJ633371 |
| <i>C. vesicaria subsp. stellata</i>     | EU363630 |
| <i>C. viscidula subsp. geracioides</i>  | EU363629 |
| <i>C. zacintha</i>                      | EU363655 |
| <i>C. foetida subsp. afghanistanica</i> | EU363604 |
| <i>Hedypnois rhagadioloides</i>         | AJ633307 |
| <i>Heteracia szovitsii</i>              | AJ633283 |
| <i>Hololeion maximowiczii</i>           | AJ633425 |
| <i>Hyoseris radiata</i>                 | AJ633299 |
| <i>Hypochoeris maculata</i>             | AJ633311 |
| <i>Ixeris chinensis</i>                 | EU363587 |
| <i>Ixeris laevigata</i>                 | EU363588 |
| <i>Ixeris stolonifera</i>               | AJ633284 |
| <i>Lapsana communis</i>                 | AJ633285 |
| <i>Phitosia crocifolia</i>              | EU363621 |
| <i>Picris echioides</i>                 | AJ633321 |
| <i>Prenanthes purpurea</i>              | AJ633342 |
| <i>Rhagadiolus edulis</i>               | AJ633297 |
| <i>Rhagadiolus stellatus</i>            | AJ633296 |
| <i>Sonchus oleraceus</i>                | AY862581 |
| <i>Soroseris glomerata</i>              | EU363656 |
| <i>Taraxacum bessarabicum</i>           | ZJ633287 |
| <i>Taraxacum erythrospermum</i>         | AJ633291 |
| <i>Taraxacum laevigatum</i>             | AJ633288 |
| <i>Youngia denticulata</i>              | AJ633293 |

|                           |          |
|---------------------------|----------|
| <i>Youngia japonica</i>   | AJ633294 |
| <i>Youngia tenuifolia</i> | EU363645 |
