# Supplementary figures and images for: Descending Dysploidy and Bidirectional Changes in Genome Size Accompanied Crepis (Asteraceae) Evolution
Source: MDPI journal article supplement (doi:10.3390/genes12091436), 2021-09-17

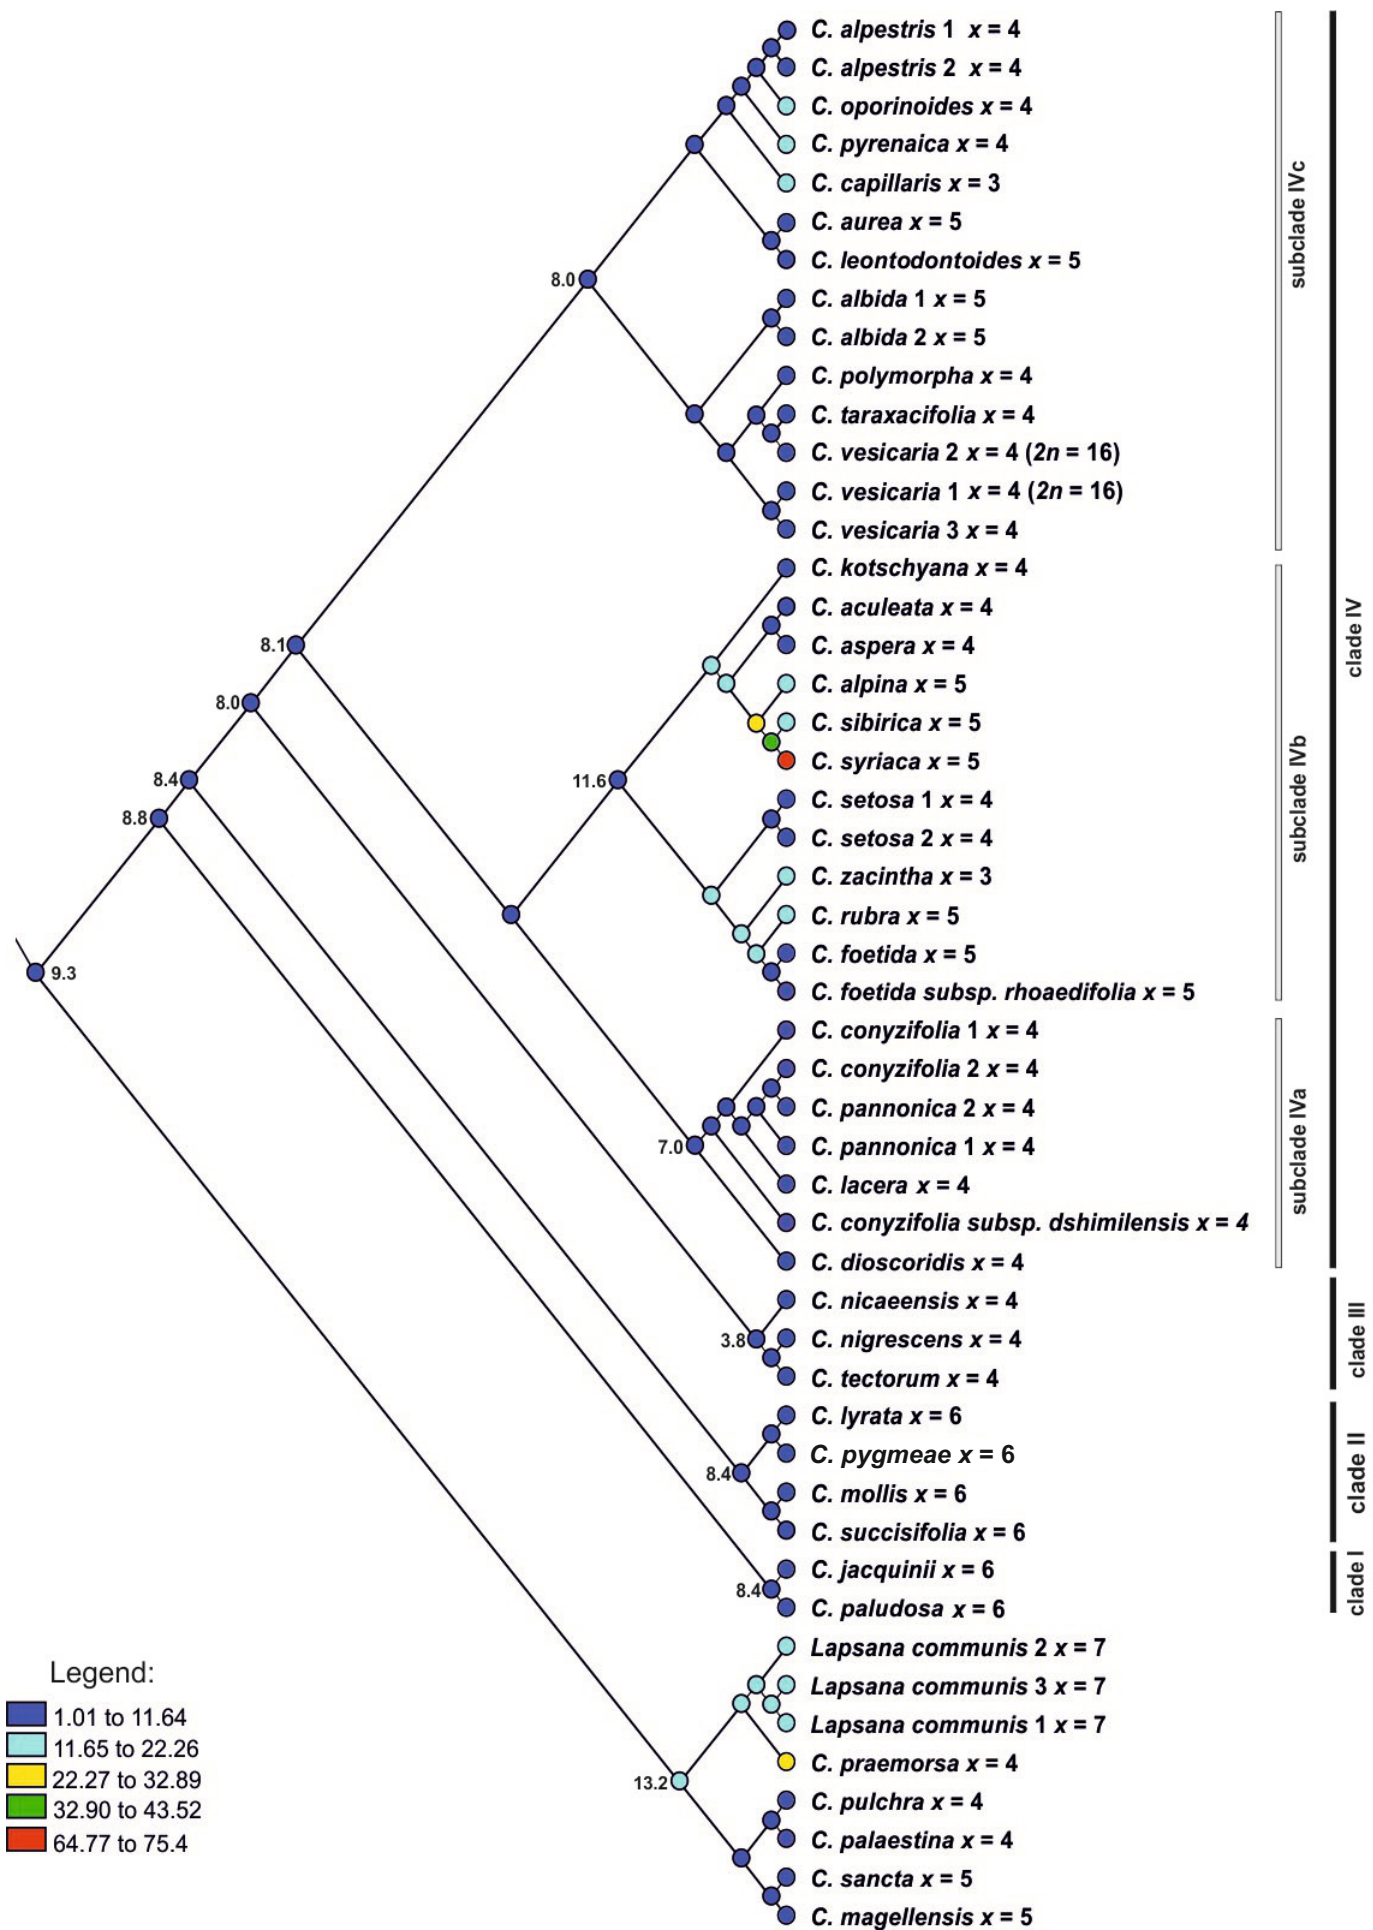

*Crepis sensus stricto*

*Lagosensis*

Supplement: s1 [file s1]

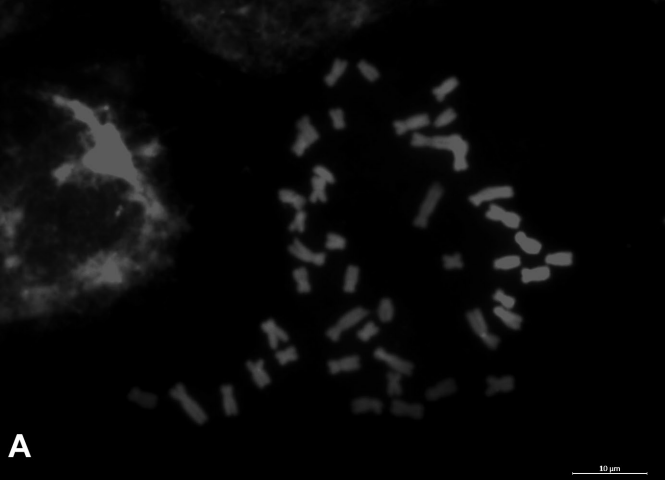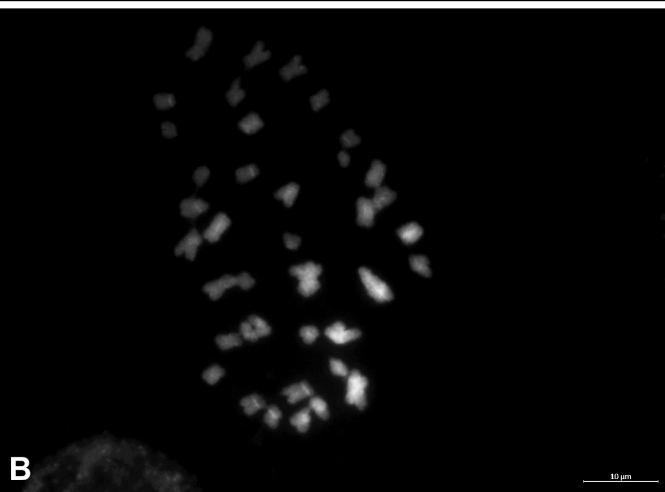

Supplement: s1 [file s1]

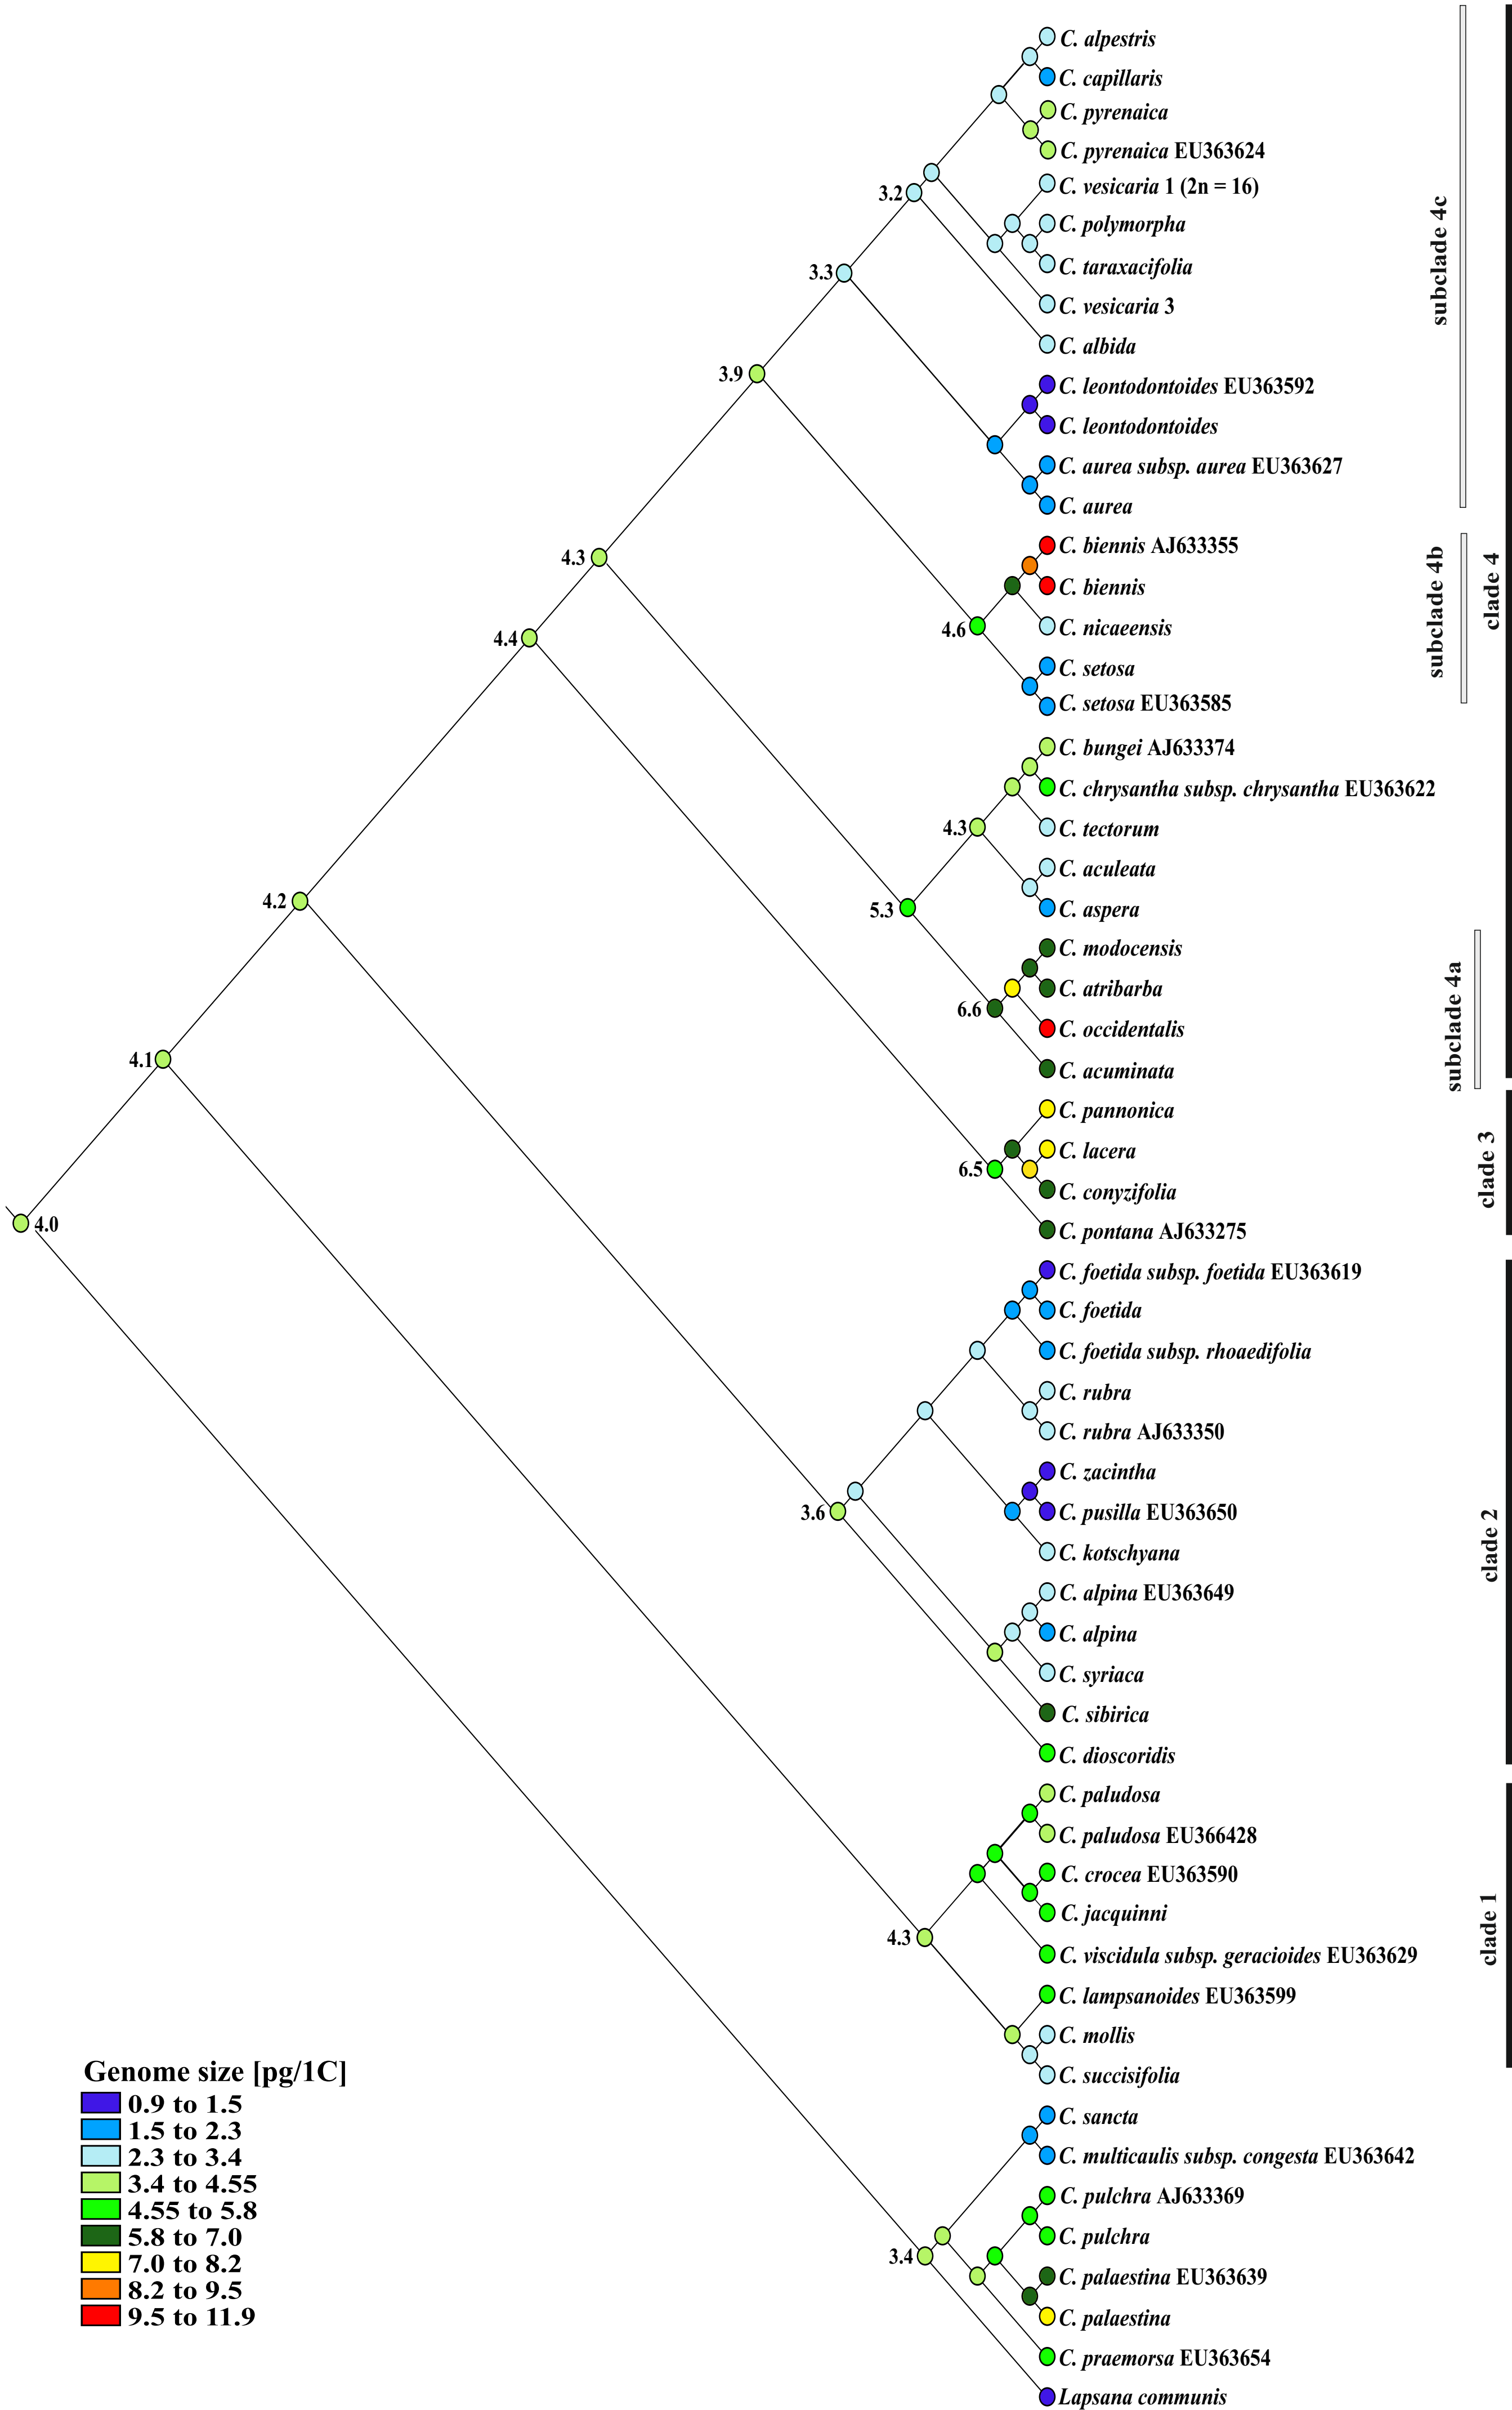

*Crepis sensu stricto*

*Lagoseris*

Supplement: s1 [file s1]

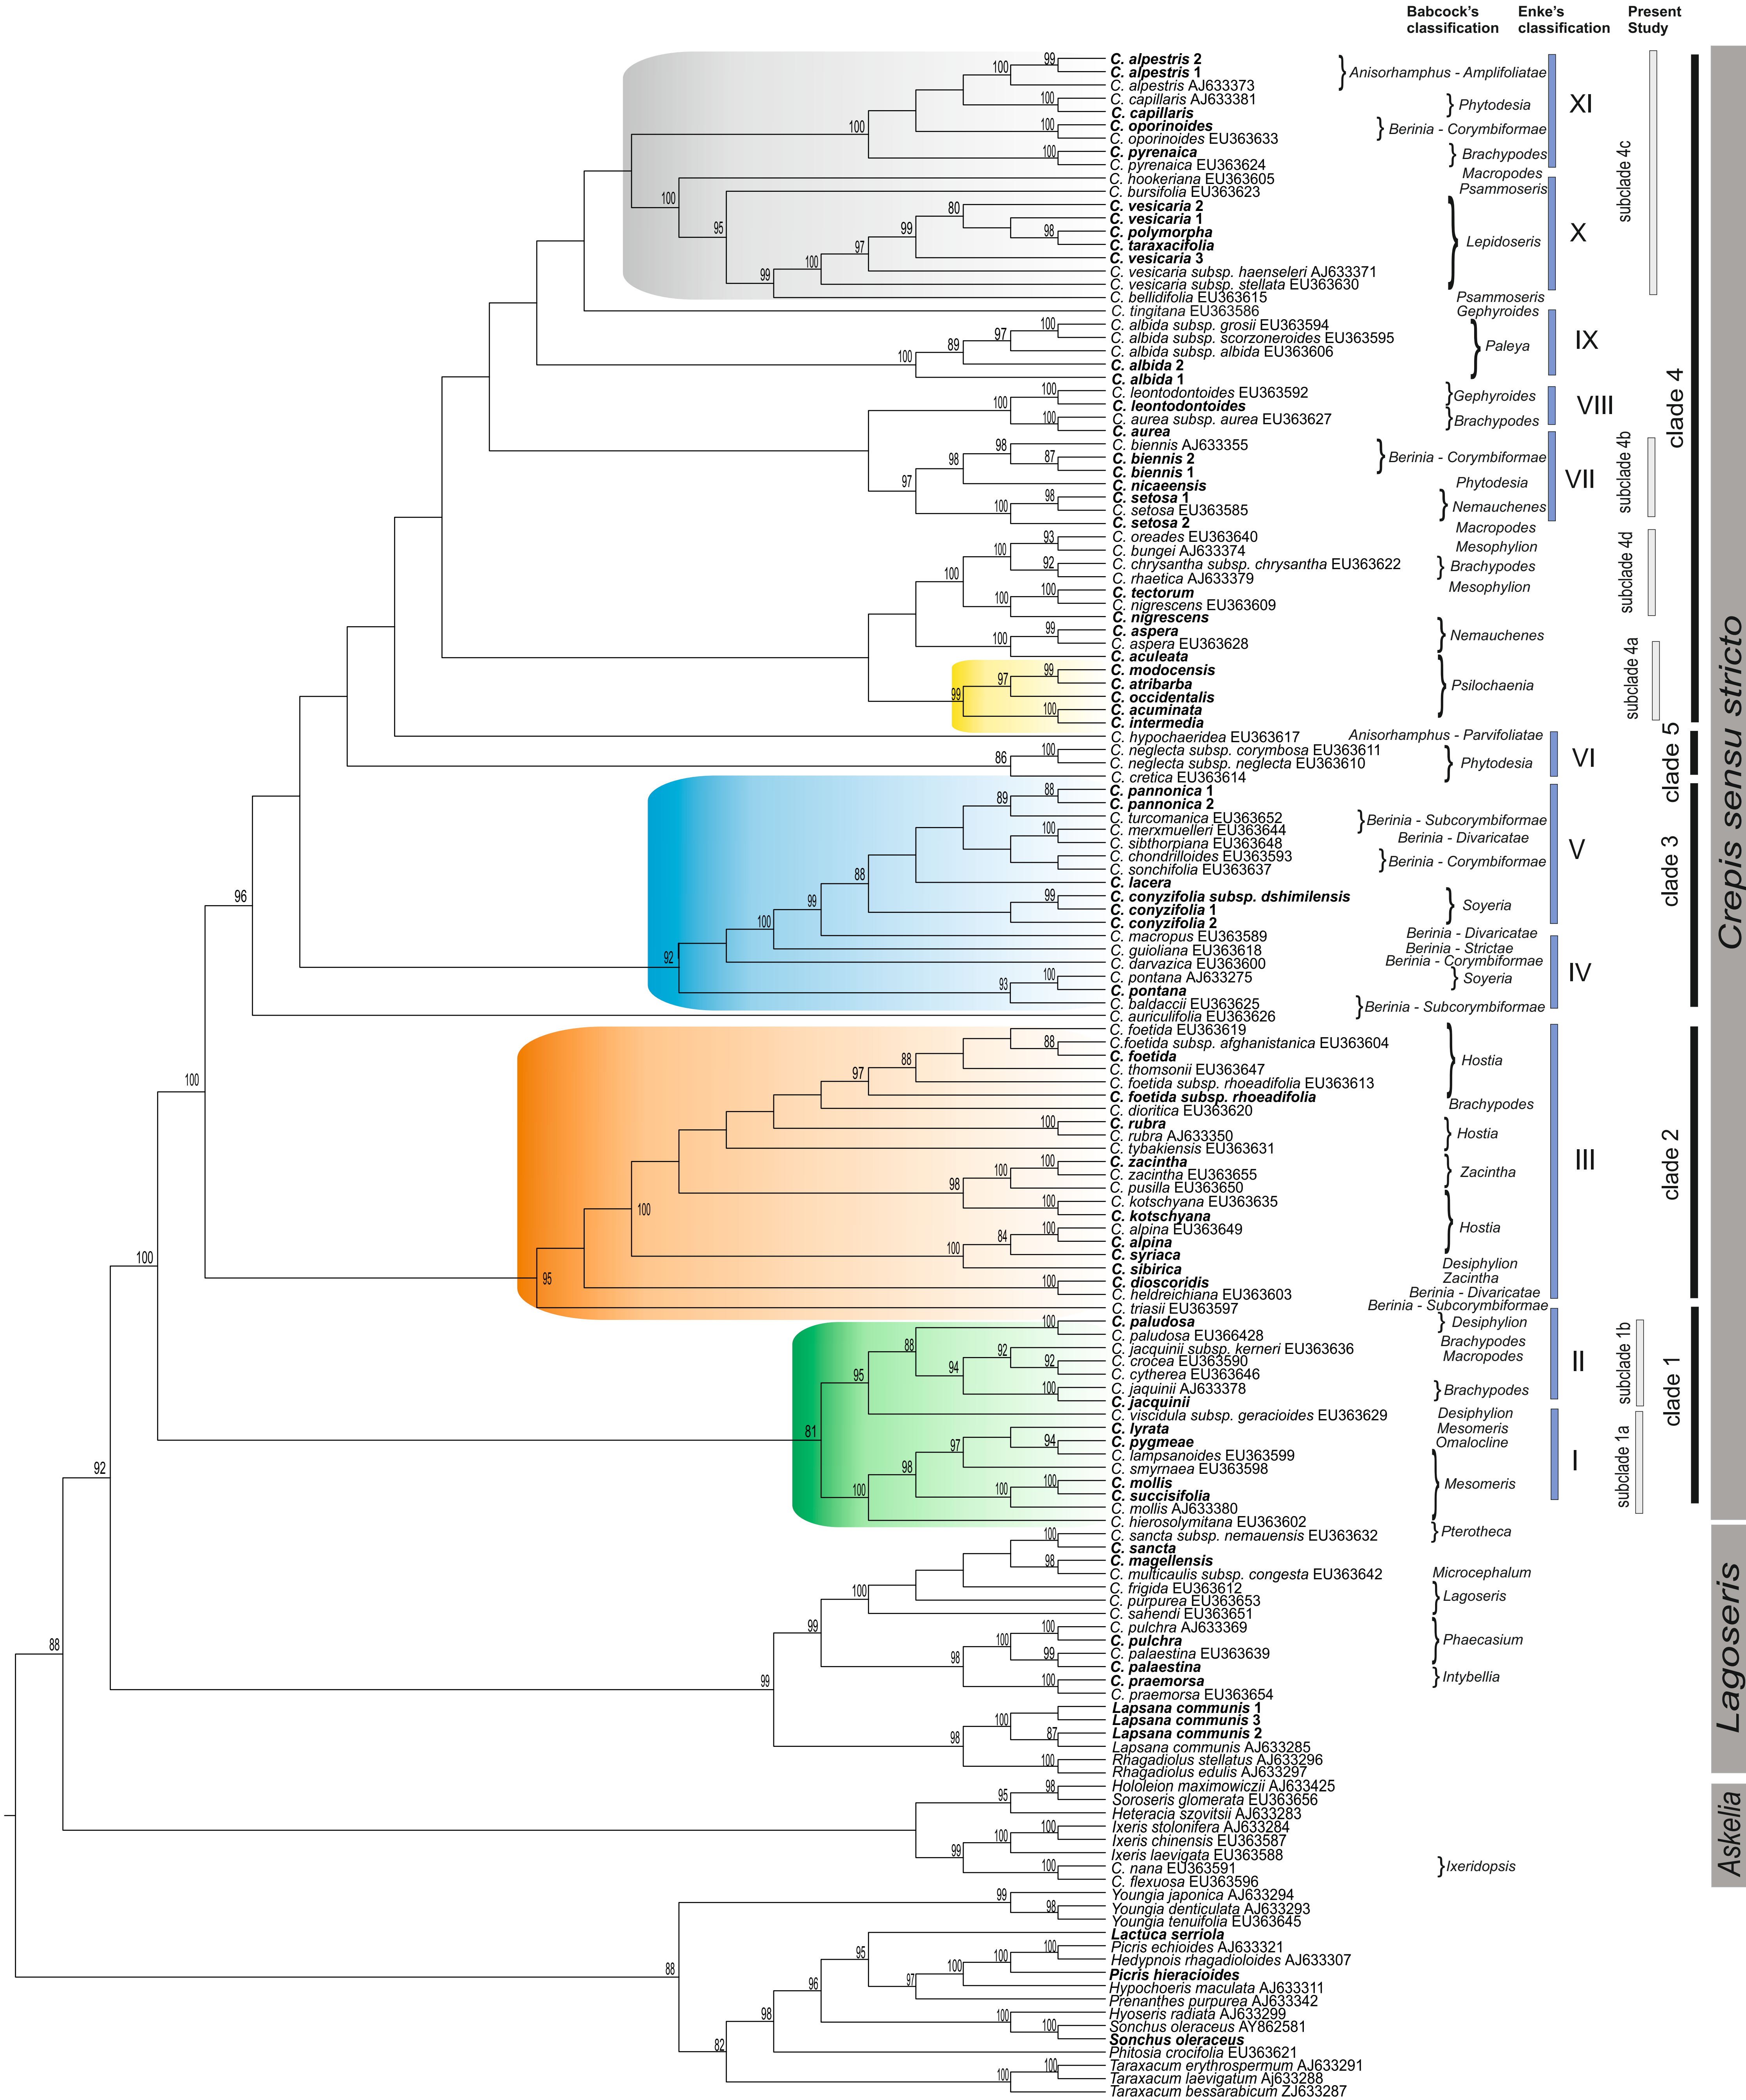

Supplement: s1 [file s1]
